# Supplementary material for: Diet and BMI Correlate with Metabolite Patterns Associated with Aggressive Prostate Cancer
Source: MDPI journal article supplement (doi:10.3390/nu14163306), 2022-08-12
Supplement: s1 [file s1]

| Table S1. Instruments used to quantify metabolites in the study population |                                                     |                                           |
|----------------------------------------------------------------------------|-----------------------------------------------------|-------------------------------------------|
| Method                                                                     | Instrument                                          | Study                                     |
| Triple quadrupole mass spectrometry (MS)                                   | Triple Quad 4500, AB Sciex, Framingham, MA          | Prostate<br>Colorectal                    |
|                                                                            | Q-Trap 5500, AB Sciex, Framingham, MA               | Liver<br>Kidney                           |
| Liquid chromatography (LC)                                                 | Agilent 1290, Agilent Technologies, Santa Clara, CA | Prostate<br>Colorectal<br>Liver<br>Kidney |

Table S2. Associations of dietary exposures and BMI with metabolite patterns in the discovery and validation sets.

| Metabolite pattern | Exposure              | $\beta$       | Discovery      |                  | Validation    |                |
|--------------------|-----------------------|---------------|----------------|------------------|---------------|----------------|
|                    |                       |               | P-value        | P <sub>adj</sub> | $\beta$       | P-value        |
| 1                  | Alcohol               | <b>0.061</b>  | <b>8.0E-11</b> | <b>1.9E-09</b>   | <b>0.044</b>  | <b>3.5E-02</b> |
|                    | Butter                | 0.047         | 2.4E-06        | 2.9E-05          | 0.026         | 2.6E-01        |
|                    | Total fish            | <b>0.076</b>  | <b>4.2E-06</b> | <b>3.3E-05</b>   | <b>0.12</b>   | <b>3.8E-04</b> |
|                    | Total fish products   | <b>0.067</b>  | <b>1.0E-05</b> | <b>4.8E-05</b>   | <b>0.12</b>   | <b>3.6E-04</b> |
|                    | Margarine             | -0.033        | 1.0E-05        | 4.8E-05          | -0.0097       | 5.8E-01        |
|                    | Fatty fish            | 0.043         | 4.5E-04        | 1.8E-03          | 0.049         | 7.9E-02        |
|                    | Lean fish             | <b>0.026</b>  | <b>1.0E-03</b> | <b>3.5E-03</b>   | <b>0.044</b>  | <b>8.7E-03</b> |
|                    | Cereals               | -0.11         | 3.2E-03        | 9.5E-03          | -0.10         | 1.2E-01        |
|                    | BMI                   | -0.015        | 1.5E-02        | 4.1E-02          | 0.0088        | 5.2E-01        |
|                    | Dairy                 | 0.041         | 3.4E-02        | 8.1E-02          |               |                |
|                    | Cheese                | 0.035         | 6.9E-02        | 1.5E-01          |               |                |
|                    | Red meat              | 0.040         | 8.4E-02        | 1.7E-01          |               |                |
|                    | Milk                  | 0.034         | 1.1E-01        | 2.0E-01          |               |                |
|                    | Vegetables (fruiting) | 0.046         | 2.1E-01        | 3.7E-01          |               |                |
|                    | Yogurt                | 0.011         | 2.3E-01        | 3.7E-01          |               |                |
|                    | Fruit                 | 0.011         | 3.1E-01        | 4.7E-01          |               |                |
|                    | Eggs                  | -0.0055       | 5.1E-01        | 7.2E-01          |               |                |
|                    | Vegetable oils        | 0.0044        | 5.7E-01        | 7.2E-01          |               |                |
|                    | Vegetables            | 0.0092        | 5.6E-01        | 7.2E-01          |               |                |
|                    | Vegetables (leafy)    | -0.0055       | 6.2E-01        | 7.4E-01          |               |                |
|                    | Fats                  | -0.0042       | 7.6E-01        | 8.6E-01          |               |                |
|                    | Vegetables (root)     | -0.0060       | 7.9E-01        | 8.6E-01          |               |                |
|                    | Poultry               | -0.0038       | 8.5E-01        | 8.8E-01          |               |                |
|                    | Processed meat        | 0.0022        | 9.1E-01        | 9.1E-01          |               |                |
| 2                  | <b>BMI</b>            | <b>0.039</b>  | <b>5.9E-11</b> | <b>1.4E-09</b>   | <b>0.046</b>  | <b>1.0E-03</b> |
|                    | Butter                | -0.049        | 5.4E-07        | 6.4E-06          | -0.046        | 5.5E-02        |
|                    | Dairy                 | -0.078        | 5.0E-05        | 3.6E-04          | -0.057        | 1.7E-01        |
|                    | Margarine             | 0.030         | 6.0E-05        | 3.6E-04          | 0.0070        | 6.9E-01        |
|                    | Milk                  | -0.073        | 4.8E-04        | 2.3E-03          | -0.051        | 2.6E-01        |
|                    | Alcohol               | 0.029         | 1.8E-03        | 7.3E-03          | -0.015        | 4.8E-01        |
|                    | Cereals               | 0.090         | 1.3E-02        | 4.3E-02          | 0.11          | 1.0E-01        |
|                    | Processed meat        | 0.028         | 1.6E-01        | 4.3E-01          |               |                |
|                    | Fats                  | 0.019         | 1.5E-01        | 4.3E-01          |               |                |
|                    | Yogurt                | -0.010        | 2.4E-01        | 5.0E-01          |               |                |
|                    | Poultry               | 0.024         | 2.2E-01        | 5.0E-01          |               |                |
|                    | Vegetable oils        | 0.0086        | 2.5E-01        | 5.0E-01          |               |                |
|                    | Vegetables (leafy)    | -0.012        | 2.8E-01        | 5.2E-01          |               |                |
|                    | Cheese                | 0.016         | 4.1E-01        | 6.1E-01          |               |                |
|                    | Total fish products   | -0.013        | 3.9E-01        | 6.1E-01          |               |                |
|                    | Total fish            | -0.013        | 4.4E-01        | 6.1E-01          |               |                |
|                    | Lean fish             | -0.0060       | 4.5E-01        | 6.1E-01          |               |                |
|                    | Vegetables            | -0.013        | 4.0E-01        | 6.1E-01          |               |                |
|                    | Vegetables (fruiting) | -0.023        | 5.4E-01        | 6.4E-01          |               |                |
|                    | Fruit                 | 0.0066        | 5.3E-01        | 6.4E-01          |               |                |
|                    | Fatty fish            | -0.0067       | 5.9E-01        | 6.7E-01          |               |                |
|                    | Vegetables (root)     | 0.0080        | 7.2E-01        | 7.8E-01          |               |                |
|                    | Red meat              | 0.0052        | 8.2E-01        | 8.6E-01          |               |                |
|                    | Eggs                  | -0.0011       | 8.9E-01        | 8.9E-01          |               |                |
| 3                  | <b>BMI</b>            | <b>-0.068</b> | <b>5.7E-32</b> | <b>1.4E-30</b>   | <b>-0.036</b> | <b>7.4E-03</b> |
|                    | Alcohol               | 0.044         | 6.9E-07        | 8.3E-06          | 0.025         | 2.2E-01        |
|                    | <b>Fatty fish</b>     | <b>-0.041</b> | <b>4.1E-04</b> | <b>3.3E-03</b>   | <b>-0.071</b> | <b>9.7E-03</b> |
|                    | Total fish products   | -0.041        | 4.1E-03        | 2.4E-02          | -0.026        | 4.2E-01        |
|                    | Eggs                  | 0.021         | 8.9E-03        | 3.8E-02          | 0.015         | 4.4E-01        |
|                    | Total fish            | -0.041        | 9.6E-03        | 3.8E-02          | -0.028        | 4.3E-01        |

|                       |         |         |         |
|-----------------------|---------|---------|---------|
| Butter                | 0.016   | 8.1E-02 | 2.8E-01 |
| Margarine             | -0.011  | 1.2E-01 | 3.2E-01 |
| Vegetables (fruiting) | 0.055   | 1.2E-01 | 3.2E-01 |
| Cereals               | -0.050  | 1.5E-01 | 3.6E-01 |
| Milk                  | 0.026   | 1.9E-01 | 3.9E-01 |
| Poultry               | -0.025  | 1.8E-01 | 3.9E-01 |
| Dairy                 | 0.021   | 2.5E-01 | 4.3E-01 |
| Lean fish             | -0.0085 | 2.4E-01 | 4.3E-01 |
| Cheese                | 0.015   | 4.1E-01 | 5.4E-01 |
| Processed meat        | 0.016   | 4.1E-01 | 5.4E-01 |
| Vegetables            | 0.013   | 3.9E-01 | 5.4E-01 |
| Vegetables (leafy)    | 0.0098  | 3.5E-01 | 5.4E-01 |
| Vegetables (root)     | -0.016  | 4.4E-01 | 5.6E-01 |
| Red meat              | 0.0084  | 7.1E-01 | 8.2E-01 |
| Vegetable oils        | 0.0026  | 7.2E-01 | 8.2E-01 |
| Yogurt                | -0.0022 | 8.0E-01 | 8.7E-01 |
| Fats                  | -0.0014 | 9.1E-01 | 9.1E-01 |
| Fruit                 | 0.0016  | 8.8E-01 | 9.1E-01 |

All models were adjusted for age at blood collection, time of day of blood collection, energy intake (kcal/day), fasting status at blood collection, education level, physical activity, smoking status, baseline alcohol consumption, and body mass index (BMI). Models that examined alcohol intake and BMI as main exposures were not adjusted for alcohol intake and BMI, respectively.

Variables are ordered by lowest  $P_{\text{adj}}$  value per metabolite pattern.

To account for multiple testing, only dietary correlates of treelets that passed the false discovery rate of 0.05 ( $P_{\text{adj}} < 0.05$ ), using the Benjamini-Hochberg method, were further analysed in the validation set.

Bolded variables within the table refer to exposures that were found to be significant ( $P\text{-value} < 0.05$ ) in the validation set.

$\beta$  is per 1 unit described in Table 1 (excluding BMI, in which  $\beta$  is per 1 unit  $\text{kg/m}^2$ ).

Abbreviations: BMI, body mass index

**Table S3. Associations of validated dietary exposures and BMI with individual metabolites loading on each metabolite pattern**

| Metabolite pattern | Exposure            | Metabolite   | $\beta$ | P-value | P <sub>adj</sub> |
|--------------------|---------------------|--------------|---------|---------|------------------|
| 1                  | Alcohol             | PC aa C32:1  | 0.082   | 5.8E-91 | 1.5E-88          |
|                    | Alcohol             | PC aa C34:1  | 0.038   | 4.1E-68 | 5.5E-66          |
|                    | Alcohol             | PC aa C36:4  | 0.029   | 3.5E-53 | 3.1E-51          |
|                    | Total fish products | PC aa C42:2  | 0.048   | 1.1E-47 | 7.0E-46          |
|                    | Total fish          | PC aa C42:2  | 0.052   | 1.5E-46 | 8.3E-45          |
|                    | Alcohol             | PC ae C36:0  | 0.030   | 2.6E-46 | 1.2E-44          |
|                    | Total fish products | PC aa C38:0  | 0.049   | 3.1E-46 | 1.2E-44          |
|                    | Alcohol             | PC aa C32:0  | 0.023   | 9.9E-46 | 3.3E-44          |
|                    | Total fish          | PC aa C38:0  | 0.052   | 8.6E-44 | 2.6E-42          |
|                    | Total fish products | PC aa C38:6  | 0.054   | 3.7E-43 | 9.9E-42          |
|                    | Alcohol             | PC ae C36:2  | -0.026  | 1.9E-41 | 4.7E-40          |
|                    | Total fish          | PC aa C38:6  | 0.057   | 2.2E-39 | 4.8E-38          |
|                    | Total fish products | PC aa C36:0  | 0.050   | 2.1E-38 | 4.4E-37          |
|                    | Total fish          | PC aa C36:0  | 0.054   | 4.0E-36 | 7.6E-35          |
|                    | Alcohol             | PC aa C36:5  | 0.049   | 2.6E-32 | 4.7E-31          |
|                    | Total fish products | PC aa C40:6  | 0.049   | 1.1E-31 | 1.9E-30          |
|                    | Alcohol             | SM(OH) C16:1 | -0.023  | 7.8E-29 | 1.2E-27          |
|                    | Total fish products | PC aa C36:6  | 0.057   | 9.7E-29 | 1.4E-27          |
|                    | Total fish          | PC aa C40:6  | 0.052   | 9.5E-29 | 1.4E-27          |
|                    | Alcohol             | PC aa C30:0  | 0.029   | 1.4E-28 | 1.7E-27          |
|                    | Alcohol             | PC aa C34:4  | 0.030   | 1.3E-28 | 1.7E-27          |
|                    | Total fish products | PC aa C36:5  | 0.071   | 4.7E-28 | 5.7E-27          |
|                    | Total fish products | PC ae C40:6  | 0.034   | 7.1E-28 | 8.2E-27          |
|                    | Total fish          | PC aa C36:6  | 0.061   | 1.8E-27 | 2.0E-26          |
|                    | Total fish          | PC ae C40:6  | 0.037   | 3.3E-27 | 3.5E-26          |
|                    | Total fish          | PC aa C36:5  | 0.076   | 4.8E-27 | 5.0E-26          |
|                    | Alcohol             | PC ae C36:5  | 0.022   | 6.1E-27 | 6.1E-26          |
|                    | Lean fish           | PC aa C42:2  | 0.018   | 1.9E-26 | 1.9E-25          |
|                    | Alcohol             | SM(OH) C14:1 | -0.022  | 1.1E-25 | 1.0E-24          |
|                    | Alcohol             | PC aa C36:1  | 0.024   | 1.4E-25 | 1.2E-24          |
|                    | Total fish products | PC ae C38:6  | 0.034   | 1.8E-25 | 1.6E-24          |
|                    | Alcohol             | SM(OH) C22:2 | -0.019  | 5.5E-25 | 4.6E-24          |
|                    | Alcohol             | PC aa C38:5  | 0.022   | 7.0E-25 | 5.7E-24          |
|                    | Total fish          | PC ae C42:3  | 0.032   | 9.5E-25 | 7.5E-24          |
|                    | Total fish products | PC ae C36:0  | 0.033   | 3.1E-24 | 2.4E-23          |
|                    | Total fish products | PC ae C42:3  | 0.029   | 3.3E-24 | 2.5E-23          |
|                    | Total fish          | PC ae C38:6  | 0.036   | 5.1E-24 | 3.7E-23          |
|                    | Total fish          | PC aa C42:0  | 0.036   | 2.6E-23 | 1.8E-22          |
|                    | Total fish          | PC aa C42:1  | 0.036   | 4.0E-23 | 2.8E-22          |
|                    | Total fish products | PC aa C42:0  | 0.033   | 1.9E-22 | 1.2E-21          |
|                    | Total fish          | PC ae C36:0  | 0.035   | 2.9E-22 | 1.9E-21          |
|                    | Total fish products | PC aa C42:1  | 0.032   | 3.6E-22 | 2.3E-21          |
|                    | Alcohol             | PC aa C34:3  | 0.021   | 4.2E-21 | 2.6E-20          |
|                    | Alcohol             | PC aa C40:4  | 0.020   | 3.1E-20 | 1.9E-19          |
|                    | Alcohol             | PC ae C30:2  | -0.017  | 4.9E-19 | 2.9E-18          |
|                    | Alcohol             | PC ae C38:3  | -0.016  | 1.0E-18 | 5.8E-18          |
|                    | Alcohol             | PC aa C38:6  | 0.021   | 3.0E-17 | 1.7E-16          |
|                    | Lean fish           | PC aa C38:0  | 0.015   | 5.7E-17 | 3.2E-16          |
|                    | Total fish products | PC aa C40:4  | -0.029  | 6.3E-17 | 3.4E-16          |
|                    | Alcohol             | PC aa C40:5  | 0.019   | 3.1E-16 | 1.6E-15          |
|                    | Total fish          | PC aa C40:4  | -0.030  | 2.4E-15 | 1.3E-14          |
|                    | Total fish products | PC ae C40:1  | 0.024   | 3.0E-15 | 1.5E-14          |
|                    | Total fish          | PC ae C40:1  | 0.027   | 3.0E-15 | 1.5E-14          |
|                    | Total fish products | PC ae C42:2  | 0.024   | 3.4E-15 | 1.7E-14          |
|                    | Total fish          | PC ae C42:2  | 0.026   | 6.1E-15 | 3.0E-14          |
|                    | Total fish          | PC ae C32:2  | 0.024   | 2.9E-14 | 1.4E-13          |
|                    | Total fish products | PC ae C32:2  | 0.021   | 4.9E-14 | 2.3E-13          |
|                    | Total fish products | PC aa C40:2  | 0.027   | 9.2E-14 | 4.2E-13          |
|                    | Alcohol             | PC aa C36:6  | 0.024   | 9.7E-14 | 4.4E-13          |
|                    | Lean fish           | PC aa C36:0  | 0.015   | 2.4E-13 | 1.1E-12          |
|                    | Lean fish           | PC ae C36:0  | 0.012   | 1.2E-12 | 5.3E-12          |
|                    | Alcohol             | PC aa C38:4  | 0.015   | 2.3E-12 | 1.0E-11          |
|                    | Total fish          | PC aa C40:2  | 0.028   | 2.5E-12 | 1.1E-11          |

|                     |             |         |         |         |
|---------------------|-------------|---------|---------|---------|
| Alcohol             | PC aa C34:2 | 0.0090  | 4.0E-12 | 1.7E-11 |
| Total fish products | PC ae C40:2 | 0.022   | 4.1E-12 | 1.7E-11 |
| Lean fish           | PC ae C42:3 | 0.010   | 4.9E-12 | 2.0E-11 |
| Total fish          | PC ae C40:2 | 0.024   | 7.7E-12 | 3.1E-11 |
| Total fish products | PC ae C38:4 | -0.019  | 8.2E-12 | 3.2E-11 |
| Lean fish           | PC aa C38:6 | 0.014   | 1.2E-11 | 4.8E-11 |
| Alcohol             | PC ae C40:6 | -0.013  | 1.7E-11 | 6.5E-11 |
| Lean fish           | PC ae C40:6 | 0.011   | 7.7E-11 | 2.9E-10 |
| Lean fish           | PC aa C42:1 | 0.011   | 9.2E-11 | 3.4E-10 |
| Alcohol             | PC ae C40:1 | 0.012   | 2.8E-10 | 1.0E-09 |
| Total fish          | PC ae C38:4 | -0.019  | 4.1E-10 | 1.5E-09 |
| Alcohol             | PC ae C32:1 | 0.010   | 9.0E-10 | 3.2E-09 |
| Alcohol             | PC ae C34:2 | -0.011  | 1.0E-09 | 3.6E-09 |
| Alcohol             | PC aa C36:3 | 0.010   | 1.1E-09 | 3.8E-09 |
| Lean fish           | PC ae C32:2 | 0.0090  | 1.5E-09 | 5.1E-09 |
| Alcohol             | PC ae C40:3 | -0.0090 | 1.8E-09 | 6.0E-09 |
| Lean fish           | PC ae C38:6 | 0.010   | 3.1E-09 | 1.1E-08 |
| Alcohol             | PC aa C32:3 | -0.011  | 4.6E-09 | 1.5E-08 |
| Lean fish           | PC aa C40:6 | 0.013   | 5.0E-09 | 1.6E-08 |
| Alcohol             | PC ae C38:2 | -0.010  | 1.9E-08 | 6.1E-08 |
| Alcohol             | PC ae C42:1 | 0.0090  | 1.9E-08 | 6.1E-08 |
| Lean fish           | PC aa C36:6 | 0.015   | 2.4E-08 | 7.5E-08 |
| Lean fish           | PC ae C40:1 | 0.0090  | 2.4E-08 | 7.5E-08 |
| Lean fish           | PC aa C42:0 | 0.010   | 2.7E-08 | 8.3E-08 |
| Lean fish           | PC aa C36:5 | 0.019   | 3.6E-08 | 1.1E-07 |
| Total fish products | PC aa C40:3 | 0.019   | 6.3E-08 | 1.9E-07 |
| Total fish products | PC aa C38:4 | -0.018  | 8.7E-08 | 2.6E-07 |
| Lean fish           | PC ae C42:2 | 0.0080  | 9.6E-08 | 2.8E-07 |
| Alcohol             | PC aa C42:2 | 0.011   | 1.4E-07 | 4.0E-07 |
| Total fish          | PC aa C38:4 | -0.019  | 1.7E-07 | 4.9E-07 |
| Total fish          | PC aa C40:3 | 0.020   | 2.7E-07 | 7.7E-07 |
| Total fish          | PC ae C34:0 | 0.020   | 5.5E-07 | 1.5E-06 |
| Alcohol             | PC ae C36:4 | 0.010   | 6.2E-07 | 1.7E-06 |
| Alcohol             | PC ae C32:2 | 0.0090  | 1.4E-06 | 3.8E-06 |
| Total fish products | PC aa C36:4 | -0.014  | 1.5E-06 | 4.1E-06 |
| Lean fish           | PC ae C40:2 | 0.0080  | 2.4E-06 | 6.5E-06 |
| Total fish products | PC ae C34:0 | 0.017   | 4.2E-06 | 1.1E-05 |
| Total fish          | PC aa C36:4 | -0.015  | 4.6E-06 | 1.2E-05 |
| Total fish products | PC aa C42:5 | 0.017   | 1.0E-05 | 2.5E-05 |
| Total fish products | PC ae C40:4 | -0.011  | 1.0E-05 | 2.5E-05 |
| Lean fish           | PC aa C40:2 | 0.0081  | 1.0E-05 | 2.5E-05 |
| Lean fish           | PC ae C34:0 | 0.0086  | 1.0E-05 | 2.5E-05 |
| Alcohol             | PC ae C38:6 | 0.0091  | 1.0E-05 | 2.5E-05 |
| Alcohol             | PC ae C38:5 | 0.0070  | 2.0E-05 | 5.0E-05 |
| Alcohol             | PC ae C40:4 | -0.0068 | 2.0E-05 | 5.0E-05 |
| Total fish          | PC aa C42:5 | 0.017   | 3.0E-05 | 7.4E-05 |
| Total fish          | PC ae C30:2 | 0.013   | 4.0E-05 | 9.7E-05 |
| Alcohol             | PC aa C38:3 | 0.0083  | 4.0E-05 | 9.7E-05 |
| Alcohol             | PC aa C42:4 | 0.0072  | 7.0E-05 | 1.7E-04 |
| Lean fish           | PC ae C30:2 | 0.0060  | 9.0E-05 | 2.1E-04 |
| Alcohol             | PC aa C42:0 | -0.0082 | 1.0E-04 | 2.4E-04 |
| Total fish products | PC ae C36:4 | -0.012  | 1.2E-04 | 2.8E-04 |
| Total fish products | PC ae C30:2 | 0.011   | 1.3E-04 | 3.0E-04 |
| Lean fish           | PC ae C40:5 | 0.0050  | 1.4E-04 | 3.2E-04 |
| Alcohol             | PC ae C38:4 | -0.0066 | 1.6E-04 | 3.6E-04 |
| Total fish          | PC ae C40:4 | -0.010  | 2.0E-04 | 4.5E-04 |
| Alcohol             | PC ae C42:4 | -0.0081 | 2.5E-04 | 5.6E-04 |
| Total fish          | PC aa C38:5 | 0.014   | 2.7E-04 | 5.9E-04 |
| Alcohol             | PC ae C42:5 | -0.0058 | 2.7E-04 | 5.9E-04 |
| Alcohol             | PC aa C40:6 | 0.0097  | 2.8E-04 | 6.1E-04 |
| Total fish products | PC aa C38:5 | 0.012   | 3.8E-04 | 8.2E-04 |
| Total fish          | PC ae C36:4 | -0.012  | 4.0E-04 | 8.6E-04 |
| Lean fish           | PC aa C40:4 | -0.0062 | 4.7E-04 | 1.0E-03 |
| Total fish products | PC aa C36:3 | -0.0094 | 5.1E-04 | 1.1E-03 |
| Lean fish           | PC aa C40:3 | 0.0061  | 5.6E-04 | 1.2E-03 |
| Alcohol             | PC ae C34:3 | 0.0073  | 8.5E-04 | 1.8E-03 |
| Alcohol             | PC ae C36:3 | -0.0058 | 1.0E-03 | 2.1E-03 |

|                     |              |         |         |         |
|---------------------|--------------|---------|---------|---------|
| Total fish          | PC aa C36:3  | -0.0094 | 1.4E-03 | 2.9E-03 |
| Total fish          | SM(OH) C22:2 | 0.0099  | 1.8E-03 | 3.7E-03 |
| Alcohol             | PC aa C42:5  | 0.0073  | 1.8E-03 | 3.7E-03 |
| Lean fish           | SM(OH) C22:2 | 0.0047  | 1.8E-03 | 3.7E-03 |
| Alcohol             | PC aa C36:0  | 0.0076  | 2.1E-03 | 4.1E-03 |
| Alcohol             | PC ae C36:1  | -0.0061 | 2.5E-03 | 4.8E-03 |
| Alcohol             | PC ae C42:2  | 0.0058  | 2.5E-03 | 4.9E-03 |
| Lean fish           | PC ae C30:0  | 0.0058  | 2.6E-03 | 5.0E-03 |
| Total fish products | SM(OH) C22:2 | 0.0087  | 2.7E-03 | 5.3E-03 |
| Alcohol             | PC ae C30:0  | -0.0069 | 3.1E-03 | 6.0E-03 |
| Total fish          | PC ae C30:0  | 0.012   | 3.6E-03 | 6.9E-03 |
| Total fish          | PC ae C38:2  | 0.0090  | 3.7E-03 | 6.9E-03 |
| Total fish products | PC ae C42:4  | -0.0102 | 4.0E-03 | 7.6E-03 |
| Total fish products | PC aa C34:3  | -0.010  | 4.5E-03 | 8.4E-03 |
| Lean fish           | PC ae C36:1  | 0.0048  | 4.9E-03 | 9.1E-03 |
| Lean fish           | PC aa C32:3  | 0.0042  | 5.2E-03 | 9.5E-03 |
| Lean fish           | PC ae C40:3  | 0.0035  | 5.7E-03 | 1.0E-02 |
| Total fish          | PC ae C44:6  | 0.010   | 5.8E-03 | 1.1E-02 |
| Total fish          | PC ae C40:5  | 0.0076  | 6.1E-03 | 1.1E-02 |
| Lean fish           | PC aa C36:4  | -0.0041 | 6.1E-03 | 1.1E-02 |
| Alcohol             | PC ae C40:5  | -0.0043 | 6.2E-03 | 1.1E-02 |
| Total fish products | PC aa C40:5  | -0.010  | 7.2E-03 | 1.3E-02 |
| Total fish          | PC ae C32:1  | 0.0078  | 7.6E-03 | 1.3E-02 |
| Total fish products | PC ae C38:2  | 0.0075  | 7.9E-03 | 1.4E-02 |
| Lean fish           | PC ae C38:2  | 0.0039  | 8.0E-03 | 1.4E-02 |
| Lean fish           | PC aa C38:4  | -0.0045 | 8.1E-03 | 1.4E-02 |
| Total fish          | PC aa C34:3  | -0.0097 | 1.2E-02 | 2.1E-02 |
| Total fish          | PC aa C40:5  | -0.010  | 1.2E-02 | 2.1E-02 |
| Lean fish           | PC ae C32:1  | 0.0035  | 1.3E-02 | 2.1E-02 |
| Total fish products | PC aa C38:3  | -0.0079 | 1.4E-02 | 2.4E-02 |
| Lean fish           | PC aa C28:1  | .00412  | 1.5E-02 | 2.4E-02 |
| Total fish products | PC ae C30:0  | 0.0091  | 1.6E-02 | 2.6E-02 |
| Total fish          | PC ae C36:1  | 0.0085  | 1.6E-02 | 2.6E-02 |
| Total fish          | PC aa C32:0  | 0.0068  | 1.7E-02 | 2.8E-02 |
| Total fish          | PC aa C28:1  | 0.0084  | 1.7E-02 | 2.8E-02 |
| Total fish products | PC ae C40:5  | 0.0060  | 1.8E-02 | 2.8E-02 |
| Alcohol             | PC ae C40:2  | -0.0047 | 1.8E-02 | 3.0E-02 |
| Lean fish           | PC ae C38:4  | -0.0034 | 1.9E-02 | 3.0E-02 |
| Lean fish           | PC aa C42:5  | 0.0043  | 2.0E-02 | 3.1E-02 |
| Total fish products | PC aa C28:1  | 0.0075  | 2.1E-02 | 3.3E-02 |
| Lean Total fish     | SM(OH) C14:1 | 0.0039  | 2.2E-02 | 3.4E-02 |
| Total fish          | PC aa C38:3  | -0.0081 | 2.3E-02 | 3.6E-02 |
| Total fish products | PC ae C32:1  | 0.0061  | 2.3E-02 | 3.6E-02 |
| Alcohol             | PC ae C42:3  | 0.0041  | 2.4E-02 | 3.7E-02 |
| Total fish products | PC ae C44:6  | 0.0077  | 2.4E-02 | 3.7E-02 |
| Lean fish           | PC ae C42:1  | 0.0030  | 2.6E-02 | 3.9E-02 |
| Total fish products | PC aa C34:4  | -0.0097 | 2.6E-02 | 4.0E-02 |
| Total fish products | PC ae C36:1  | 0.0071  | 2.7E-02 | 4.1E-02 |
| Lean fish           | PC aa C38:5  | 0.0038  | 3.3E-02 | 4.9E-02 |
| Total fish products | PC aa C32:0  | 0.0054  | 3.7E-02 | 5.5E-02 |
| Total fish          | PC aa C32:3  | 0.0066  | 4.2E-02 | 6.2E-02 |
| Total fish          | PC ae C40:3  | 0.0054  | 4.5E-02 | 6.7E-02 |
| Lean fish           | SM(OH) C16:1 | 0.0033  | 4.6E-02 | 6.8E-02 |
| Total fish          | PC aa C34:4  | -0.0094 | 4.9E-02 | 7.1E-02 |
| Total fish          | PC ae C42:4  | -0.0076 | 5.1E-02 | 7.4E-02 |
| Total fish products | PC aa C32:3  | 0.0057  | 5.3E-02 | 7.7E-02 |
| Lean fish           | PC ae C34:2  | 0.0029  | 5.6E-02 | 8.1E-02 |
| Alcohol             | PC aa C40:3  | 0.0041  | 6.3E-02 | 8.9E-02 |
| Lean fish           | PC ae C34:1  | 0.0027  | 6.8E-02 | 9.6E-02 |
| Alcohol             | PC aa C42:1  | -0.0038 | 7.0E-02 | 9.9E-02 |
| Total fish products | PC aa C42:4  | -0.0052 | 7.4E-02 | 1.0E-01 |
| Total fish products | PC ae C38:3  | -0.0051 | 7.9E-02 | 1.1E-01 |
| Lean fish           | PC aa C36:1  | 0.0033  | 8.0E-02 | 1.1E-01 |
| Total fish          | SM(OH) C14:1 | 0.0064  | 8.1E-02 | 1.1E-01 |
| Total fish products | PC aa C32:1  | -0.011  | 8.5E-02 | 1.2E-01 |
| Total fish products | PC ae C38:5  | -0.0046 | 8.8E-02 | 1.2E-01 |
| Lean fish           | PC aa C34:1  | 0.0031  | 9.0E-02 | 1.2E-01 |

|                     |              |          |         |         |
|---------------------|--------------|----------|---------|---------|
| Total fish          | SM(OH) C16:1 | 0.0059   | 9.9E-02 | 1.3E-01 |
| Total fish          | PC aa C42:4  | -0.0051  | 1.1E-01 | 1.5E-01 |
| Total fish products | PC ae C40:3  | 0.0039   | 1.1E-01 | 1.5E-01 |
| Lean fish           | PC ae C42:5  | 0.0021   | 1.2E-01 | 1.6E-01 |
| Lean fish           | PC ae C44:6  | 0.0027   | 1.2E-01 | 1.6E-01 |
| Total fish          | PC ae C38:5  | -0.0045  | 1.2E-01 | 1.6E-01 |
| Alcohol             | PC ae C44:6  | -0.0033  | 1.3E-01 | 1.7E-01 |
| Alcohol             | PC aa C36:2  | 0.0022   | 1.3E-01 | 1.7E-01 |
| Lean fish           | PC aa C34:3  | -0.0027  | 1.3E-01 | 1.7E-01 |
| Total fish          | PC aa C32:1  | -0.0102  | 1.4E-01 | 1.8E-01 |
| Total fish          | PC aa C34:1  | 0.0054   | 1.4E-01 | 1.8E-01 |
| Total fish products | SM(OH) C16:1 | 0.0047   | 1.5E-01 | 1.9E-01 |
| Lean fish           | PC aa C34:4  | -0.0032  | 1.5E-01 | 1.9E-01 |
| Lean fish           | PC ae C36:2  | 0.0022   | 1.5E-01 | 1.9E-01 |
| Total fish products | PC aa C34:1  | 0.0048   | 1.5E-01 | 1.9E-01 |
| Total fish          | PC ae C42:1  | 0.0042   | 1.5E-01 | 1.9E-01 |
| Total fish products | SM(OH) C14:1 | 0.0048   | 1.5E-01 | 1.9E-01 |
| Lean fish           | PC aa C32:0  | 0.0019   | 1.6E-01 | 2.0E-01 |
| Alcohol             | PC ae C44:5  | 0.0030   | 1.6E-01 | 2.0E-01 |
| Total fish          | PC ae C38:3  | -0.0042  | 1.9E-01 | 2.3E-01 |
| Lean fish           | PC aa C40:5  | -0.0025  | 1.9E-01 | 2.3E-01 |
| Lean fish           | PC ae C36:3  | 0.0018   | 2.1E-01 | 2.6E-01 |
| Total fish products | PC aa C36:1  | 0.0044   | 2.2E-01 | 2.7E-01 |
| Total fish          | PC aa C36:1  | 0.0047   | 2.3E-01 | 2.8E-01 |
| Total fish          | PC ae C34:2  | 0.0038   | 2.3E-01 | 2.8E-01 |
| Lean fish           | PC ae C36:4  | -0.0018  | 2.4E-01 | 2.8E-01 |
| Total fish          | PC ae C36:2  | 0.0038   | 2.5E-01 | 3.0E-01 |
| Lean fish           | PC ae C44:5  | 0.0020   | 2.7E-01 | 3.2E-01 |
| Total fish          | PC ae C36:5  | 0.0040   | 2.7E-01 | 3.2E-01 |
| Lean fish           | PC aa C32:1  | -0.0034  | 3.0E-01 | 3.5E-01 |
| Lean fish           | PC ae C34:3  | 0.0018   | 3.1E-01 | 3.7E-01 |
| Total fish products | PC ae C36:5  | 0.0033   | 3.3E-01 | 3.8E-01 |
| Total fish products | PC ae C42:1  | 0.0026   | 3.3E-01 | 3.9E-01 |
| Total fish products | PC ae C36:3  | -0.0026  | 3.5E-01 | 4.1E-01 |
| Alcohol             | PC ae C34:0  | 0.0021   | 3.6E-01 | 4.1E-01 |
| Lean fish           | PC aa C42:4  | -0.0013  | 3.8E-01 | 4.4E-01 |
| Total fish products | PC ae C36:2  | 0.0026   | 3.9E-01 | 4.5E-01 |
| Lean fish           | PC aa C38:3  | -0.0014  | 4.0E-01 | 4.6E-01 |
| Lean fish           | PC ae C36:5  | 0.0014   | 4.0E-01 | 4.6E-01 |
| Lean fish           | PC aa C36:3  | -0.0012  | 4.1E-01 | 4.6E-01 |
| Total fish products | PC ae C34:2  | 0.0024   | 4.2E-01 | 4.7E-01 |
| Total fish          | PC ae C34:3  | 0.0030   | 4.4E-01 | 5.0E-01 |
| Alcohol             | PC aa C38:0  | -0.0016  | 4.5E-01 | 5.1E-01 |
| Lean fish           | PC ae C44:4  | 0.0012   | 4.7E-01 | 5.2E-01 |
| Total fish products | PC aa C34:2  | -0.0015  | 4.8E-01 | 5.3E-01 |
| Lean fish           | PC aa C34:2  | -0.00080 | 4.8E-01 | 5.3E-01 |
| Total fish          | PC aa C34:2  | -0.0016  | 4.9E-01 | 5.4E-01 |
| Lean fish           | PC ae C38:3  | 0.0010   | 4.9E-01 | 5.4E-01 |
| Alcohol             | PC ae C34:1  | 0.0012   | 5.1E-01 | 5.5E-01 |
| Total fish          | PC aa C30:0  | 0.0029   | 5.2E-01 | 5.7E-01 |
| Alcohol             | PC aa C40:2  | -0.0014  | 5.5E-01 | 5.9E-01 |
| Total fish          | PC ae C34:1  | 0.0017   | 5.9E-01 | 6.4E-01 |
| Total fish          | PC ae C42:5  | 0.0015   | 6.0E-01 | 6.4E-01 |
| Total fish          | PC ae C36:3  | -0.0015  | 6.3E-01 | 6.7E-01 |
| Alcohol             | PC ae C44:4  | 0.00090  | 6.3E-01 | 6.7E-01 |
| Total fish          | PC aa C36:2  | -0.0012  | 6.5E-01 | 6.9E-01 |
| Total fish products | PC aa C36:2  | -0.0010  | 6.8E-01 | 7.2E-01 |
| Total fish products | PC ae C44:4  | -0.0012  | 6.9E-01 | 7.2E-01 |
| Total fish products | PC aa C30:0  | 0.0012   | 7.8E-01 | 8.1E-01 |
| Alcohol             | PC aa C28:1  | 0.00060  | 7.8E-01 | 8.1E-01 |
| Total fish products | PC ae C34:3  | 0.00090  | 8.0E-01 | 8.4E-01 |
| Total fish          | PC ae C44:5  | 0.00090  | 8.1E-01 | 8.4E-01 |
| Total fish products | PC ae C44:5  | -0.00080 | 8.2E-01 | 8.5E-01 |
| Lean fish           | PC ae C40:4  | -0.00030 | 8.2E-01 | 8.5E-01 |
| Lean fish           | PC ae C38:5  | 0.00020  | 8.7E-01 | 8.9E-01 |
| Lean fish           | PC ae C42:4  | 0.00030  | 8.7E-01 | 8.9E-01 |
| Total fish products | PC ae C34:1  | 0.00040  | 9.0E-01 | 9.1E-01 |

|   |                     |                        |                |                |                |
|---|---------------------|------------------------|----------------|----------------|----------------|
|   | Total fish          | PC ae C44:4            | 0.00040        | 9.0E-01        | 9.1E-01        |
|   | Lean fish           | PC aa C36:2            | -0.00010       | 9.3E-01        | 9.4E-01        |
|   | Total fish products | PC ae C42:5            | 0.00020        | 9.5E-01        | 9.6E-01        |
|   | Lean fish           | PC aa C30:0            | 0.00010        | 9.7E-01        | 9.7E-01        |
| 2 | <b>BMI</b>          | <b>Glutamate</b>       | <b>0.030</b>   | <b>1.1E-52</b> | <b>5.3E-52</b> |
|   | BMI                 | C18:1                  | 0.0027         | 9.3E-02        | 2.3E-01        |
|   | BMI                 | Ornithine              | 0.0017         | 2.3E-01        | 3.8E-01        |
|   | BMI                 | C18:2                  | -0.0015        | 4.6E-01        | 5.7E-01        |
|   | BMI                 | Taurine                | 0.00040        | 7.3E-01        | 7.3E-01        |
| 3 | <b>BMI</b>          | <b>Lyso PC a C18:1</b> | <b>-0.024</b>  | <b>2.6E-58</b> | <b>4.2E-57</b> |
|   | <b>BMI</b>          | <b>Lyso PC a C18:2</b> | <b>-0.027</b>  | <b>3.2E-57</b> | <b>2.5E-56</b> |
|   | <b>BMI</b>          | <b>Lyso PC a C17:0</b> | <b>-0.019</b>  | <b>8.2E-35</b> | <b>4.4E-34</b> |
|   | <b>BMI</b>          | <b>Lyso PC a C18:0</b> | <b>-0.010</b>  | <b>1.4E-17</b> | <b>5.8E-17</b> |
|   | <b>BMI</b>          | <b>Lyso PC a C20:4</b> | <b>-0.013</b>  | <b>6.0E-17</b> | <b>1.9E-16</b> |
|   | <b>BMI</b>          | <b>Lyso PC a C16:0</b> | <b>-0.0081</b> | <b>8.6E-14</b> | <b>2.3E-13</b> |
|   | <b>Fatty fish</b>   | <b>Lyso PC a C20:4</b> | <b>-0.017</b>  | <b>4.4E-08</b> | <b>1.0E-07</b> |
|   | <b>Fatty fish</b>   | <b>Lyso PC a C20:3</b> | <b>-0.017</b>  | <b>1.6E-07</b> | <b>3.1E-07</b> |
|   | <b>Fatty fish</b>   | <b>Lyso PC a C16:1</b> | <b>-0.012</b>  | <b>1.4E-04</b> | <b>2.5E-04</b> |
|   | <b>Fatty fish</b>   | <b>Lyso PC a C18:0</b> | <b>-0.0054</b> | <b>2.9E-02</b> | <b>3.5E-02</b> |
|   | <b>Fatty fish</b>   | <b>Lyso PC a C18:1</b> | <b>-0.0067</b> | <b>2.6E-02</b> | <b>3.5E-02</b> |
|   | <b>BMI</b>          | <b>Lyso PC a C16:1</b> | <b>-0.0034</b> | <b>2.7E-02</b> | <b>3.5E-02</b> |
|   | <b>BMI</b>          | <b>Lyso PC a C20:3</b> | <b>-0.0037</b> | <b>2.4E-02</b> | <b>3.5E-02</b> |
|   | Fatty fish          | Lyso PC a C16:0        | -0.0044        | 4.8E-02        | 5.3E-02        |
|   | Fatty fish          | Lyso PC a C17:0        | -0.0061        | 5.3E-02        | 5.3E-02        |
|   | Fatty fish          | Lyso PC a C18:2        | -0.0064        | 5.3E-02        | 5.3E-02        |

All models were adjusted for age at blood collection, time of day of blood collection, energy intake (kcal), fasting status at blood collection, education level, physical activity, smoking status, baseline alcohol consumption, and body mass index (BMI). Models that examined alcohol intake and BMI as main exposures were not adjusted for alcohol intake and BMI, respectively.

Bolded variables within the table refer to exposures that passed the false discovery rate of 0.05 ( $P_{adj} < 0.05$ ), using the Benjamini-Hochberg method.

Variables are ordered by lowest  $P_{adj}$  value

$\beta$  is per 1 unit described in Table 1 (excluding BMI, in which  $\beta$  is per 1 unit  $\text{kg/m}^2$ ).

Abbreviations: BMI, body mass index
